# Supplementary material for: Assessment of Variation in Cesarean Delivery Rates Between Public and Private Health Facilities in India From 2005 to 2016
Source: PubMed Central journal article supplement (PMC7455857; doi:10.1001/jamanetworkopen.2020.15022), 2020-08-28
Supplement: jamanetwopen-3-e2015022-s001.pdf [file jamanetwopen-3-e2015022-s001.pdf]

## Supplementary Online Content

Bhatia M, Banerjee K, Dixit P, Dwivedi LK. Assessment of variation in cesarean delivery rates between public and private health facilities in India from 2005 to 2016. *JAMA Netw Open*. 2020;3(8):2015022. doi:10.1001/jamanetworkopen.2020.15022

**eTable.** Cesarean Deliveries From 1992 to 2016

**eFigure 1.** Percentage of Cesarean Deliveries by Type of Health Facility Among Institutional Births in India, 2005 to 2016

**eFigure 2.** Funnel Plot for Proportion of Cesarean Deliveries in Private Facilities by State and Union Territory in India, 2005 to 2006

**eFigure 3.** Funnel Plot for Proportion of Cesarean Deliveries in Private Facilities by State and Union Territory in India, 2015 to 2016

This supplementary material has been provided by the authors to give readers additional information about their work.

**eTable. Cesarean Deliveries From 1992 to 2016**

| States                      | NFHS 1 (1992-93) |             |            | NFHS 2 (1998-99) |             |            | NFHS 3 (2005-06) |             |            | NFHS 4 (2015-16) |             |             |
|-----------------------------|------------------|-------------|------------|------------------|-------------|------------|------------------|-------------|------------|------------------|-------------|-------------|
|                             | Public           | Private     | CSD        | Public           | Private     | CSD        | Public           | Private     | CSD        | Public           | Private     | CSD         |
| Andaman and Nicobar Islands | N.A.             | N.A.        | N.A.       | N.A.             | N.A.        | N.A.       | N.A.             | N.A.        | N.A.       | 16.9             | 86.2        | 19.3        |
| Andhra Pradesh              | 8.3              | 15.1        | 4.4        | 17.4             | 31.5        | 14.5       | 21.5             | 42.6        | 22.2       | 25.5             | 57.0        | 40.1        |
| Arunachal Pradesh           | 4.2              | 20.0        | 1.0        | 13.2             | 25.9        | 5.4        | 10.5             | 15.3        | 3.0        | 12.5             | 37.5        | 8.9         |
| Assam                       | 9.2              | 13.7        | 1.4        | 20.8             | 22.0        | 3.8        | 21.3             | 31.1        | 5.3        | 12.9             | 53.3        | 13.4        |
| Bihar                       | 4.4              | 10.8        | 1.0        | 21.1             | 18.7        | 3.0        | 7.6              | 17.3        | 3.1        | 2.6              | 31.0        | 6.2         |
| Chandigarh                  | N.A.             | N.A.        | N.A.       | N.A.             | N.A.        | N.A.       | N.A.             | N.A.        | N.A.       | 19.5             | 44.0        | 22.6        |
| Chhattisgarh                | N.A.             | N.A.        | N.A.       | N.A.             | N.A.        | N.A.       | 24.9             | 34.2        | 4.1        | 5.7              | 46.6        | 9.9         |
| Dadra and Nagar Haveli      | N.A.             | N.A.        | N.A.       | N.A.             | N.A.        | N.A.       | N.A.             | N.A.        | N.A.       | 12.0             | 38.4        | 16.2        |
| Daman and Diu               | N.A.             | N.A.        | N.A.       | N.A.             | N.A.        | N.A.       | N.A.             | N.A.        | N.A.       | 7.3              | 26.8        | 15.8        |
| Delhi                       | 8.9              | 11.8        | 4.6        | 20.8             | 24.3        | 13.5       | 18.1             | 29.0        | 13.8       | 26.5             | 41.5        | 26.7        |
| Goa                         | 11.3             | 20.1        | 13.7       | 11.5             | 30.5        | 20.2       | 18.0             | 37.2        | 25.8       | 19.9             | 51.3        | 31.4        |
| Gujarat                     | 2.0              | 11.1        | 2.7        | 10.0             | 20.5        | 8.5        | 13.8             | 17.8        | 8.9        | 10.8             | 26.6        | 18.4        |
| Haryana                     | 10.6             | 13.6        | 2.0        | 14.4             | 20.4        | 4.3        | 14.4             | 15.3        | 5.3        | 8.6              | 25.3        | 11.7        |
| Himachal Pradesh            | 7.6              | 4.7         | 1.2        | 14.2             | 31.9        | 5.1        | 26.4             | 48.3        | 12.6       | 16.4             | 44.4        | 16.7        |
| Jammu and Kashmir           | 18.4             | 25.2        | 4.4        | 23.6             | 38.2        | 9.3        | 24.9             | 38.2        | 13.5       | 35.1             | 75.5        | 33.1        |
| Jharkhand                   | N.A.             | N.A.        | N.A.       | N.A.             | N.A.        | N.A.       | 15.9             | 22.1        | 3.9        | 4.6              | 39.5        | 9.9         |
| Karnataka                   | 7.1              | 13.3        | 3.7        | 16.3             | 27.9        | 11.1       | 17.3             | 33.4        | 15.5       | 16.9             | 40.3        | 23.6        |
| Kerala                      | 11.8             | 17.6        | 13.2       | 28.0             | 33.8        | 29.3       | 26.0             | 32.7        | 30.1       | 31.4             | 38.6        | 35.8        |
| Lakshadweep                 | N.A.             | N.A.        | N.A.       | N.A.             | N.A.        | N.A.       | N.A.             | N.A.        | N.A.       | 27.1             | 59.9        | 38.4        |
| Madhya Pradesh              | 1.0              | 1.3         | 0.8        | 9.4              | 27.1        | 3.3        | 6.8              | 29.0        | 3.5        | 5.8              | 40.8        | 8.6         |
| Maharashtra                 | 4.7              | 10.7        | 3.4        | 11.8             | 16.7        | 7.7        | 11.7             | 22.2        | 11.6       | 13.1             | 33.1        | 20.1        |
| Manipur                     | 0.8              | 0.0         | 0.2        | 14.5             | 17.4        | 5.5        | 17.7             | 27.0        | 9.0        | 22.6             | 46.2        | 21.1        |
| Meghalaya                   | 7.7              | 10.9        | 2.6        | 13.4             | 20.0        | 2.9        | 8.3              | 27.9        | 4.1        | 9.8              | 31.4        | 7.6         |
| Mizoram                     | 5.9              | 4.8         | 2.8        | 16.9             | 22.8        | 10.8       | 8.9              | 19.0        | 6.2        | 12.3             | 30.1        | 12.7        |
| Nagaland                    | 8.6              | 0.0         | 1.3        | 15.2             | 12.1        | 1.7        | 15.8             | 19.7        | 2.0        | 13.4             | 31.5        | 5.8         |
| Odisha                      | 6.6              | 11.7        | 1.2        | 19.5             | 26.2        | 5.0        | 10.0             | 32.8        | 5.1        | 11.5             | 53.7        | 13.8        |
| Puducherry                  | N.A.             | N.A.        | N.A.       | N.A.             | N.A.        | N.A.       | N.A.             | N.A.        | N.A.       | 30.4             | 48.3        | 33.6        |
| Punjab                      | 18.9             | 14.9        | 4.2        | 28.0             | 18.7        | 8.2        | 34.3             | 31.8        | 16.6       | 17.8             | 39.7        | 24.6        |
| Rajasthan                   | 5.1              | 3.2         | 0.7        | 11.5             | 13.6        | 3.1        | 11.7             | 14.7        | 3.8        | 6.1              | 23.2        | 8.6         |
| Sikkim                      | N.A.             | N.A.        | N.A.       | 22.6             | 35.9        | 7.3        | 25.0             | 44.3        | 12.3       | 18.1             | 49.3        | 20.9        |
| Tamil Nadu                  | 9.9              | 12.1        | 7.1        | 13.2             | 25.6        | 15.8       | 14.9             | 33.2        | 20.3       | 26.3             | 51.3        | 34.1        |
| Telangana                   | N.A.             | N.A.        | N.A.       | N.A.             | N.A.        | N.A.       | N.A.             | N.A.        | N.A.       | 40.3             | 74.5        | 57.7        |
| Tripura                     | 10.6             | 0.0         | 3.3        | 14.7             | 52.9        | 8.0        | 23.7             | 69.5        | 12.9       | 18.1             | 73.7        | 20.5        |
| Uttar Pradesh               | 5.7              | 5.8         | 0.7        | 11.8             | 22.3        | 2.8        | 11.1             | 25.9        | 4.4        | 4.7              | 31.3        | 9.4         |
| Uttarakhand                 | N.A.             | N.A.        | N.A.       | N.A.             | N.A.        | N.A.       | 22.3             | 28.0        | 8.1        | 9.3              | 36.4        | 13.1        |
| West Bengal                 | 10.1             | 24.0        | 4.0        | 20.8             | 40.1        | 10.3       | 16.6             | 47.6        | 10.2       | 18.8             | 70.9        | 23.8        |
| <b>India</b>                | <b>7.2</b>       | <b>12.3</b> | <b>2.5</b> | <b>15.7</b>      | <b>24.6</b> | <b>7.1</b> | <b>15.2</b>      | <b>27.9</b> | <b>8.5</b> | <b>11.9</b>      | <b>40.9</b> | <b>17.2</b> |

**Note:** N.A. Data not available or not collected

CSD: Cesarean Section Deliveries out of total births

Chhattisgarh, Jharkhand and Uttarakhand were carved out of Madhya Pradesh, Bihar and Uttar Pradesh, respectively, in 2000. Andhra Pradesh was divided into Andhra Pradesh and Telangana in 2014.

**eFigure 1.** Percentage of Cesarean Deliveries by Type of Health Facility Among Institutional Births in India, 2005 to 2016

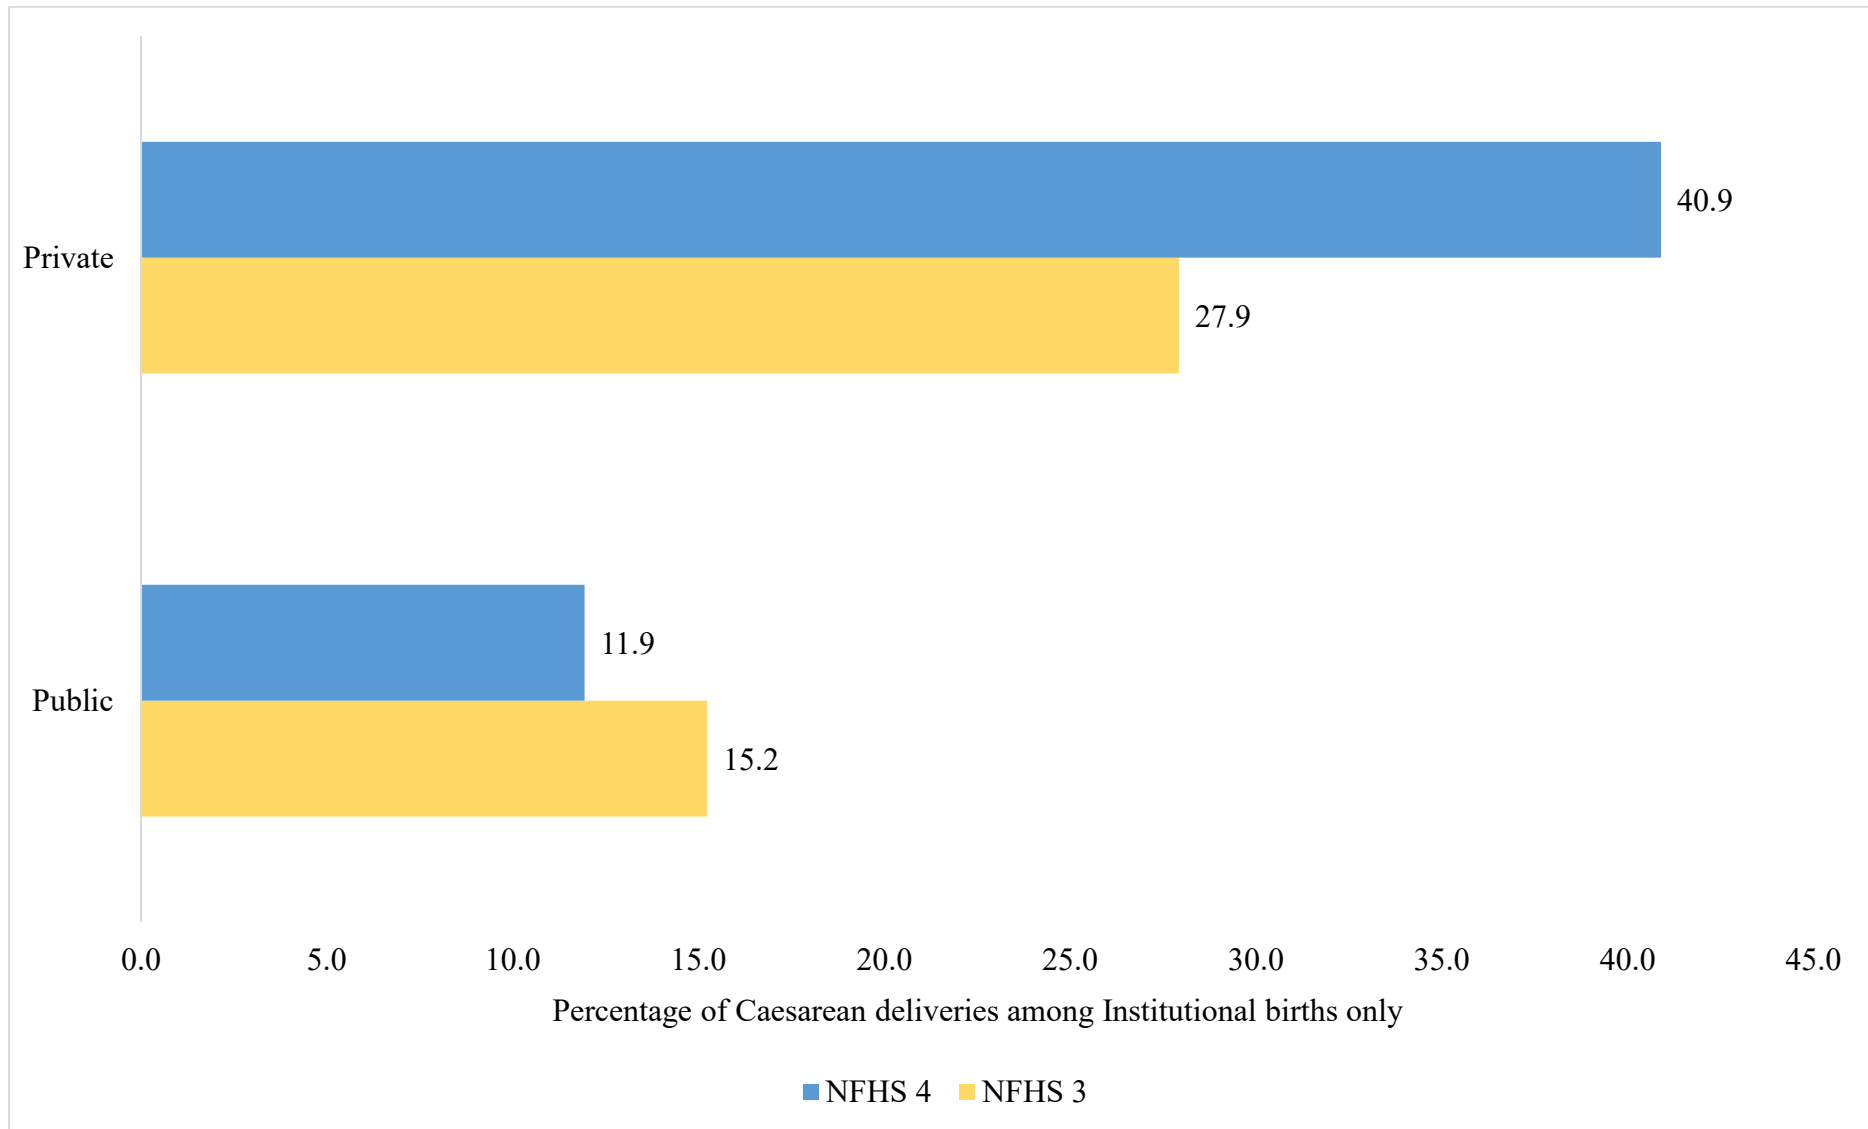

**eFigure 2.** Funnel Plot for Proportion of Cesarean Deliveries in Private Facilities by State and Union Territory in India, 2005 to 2006

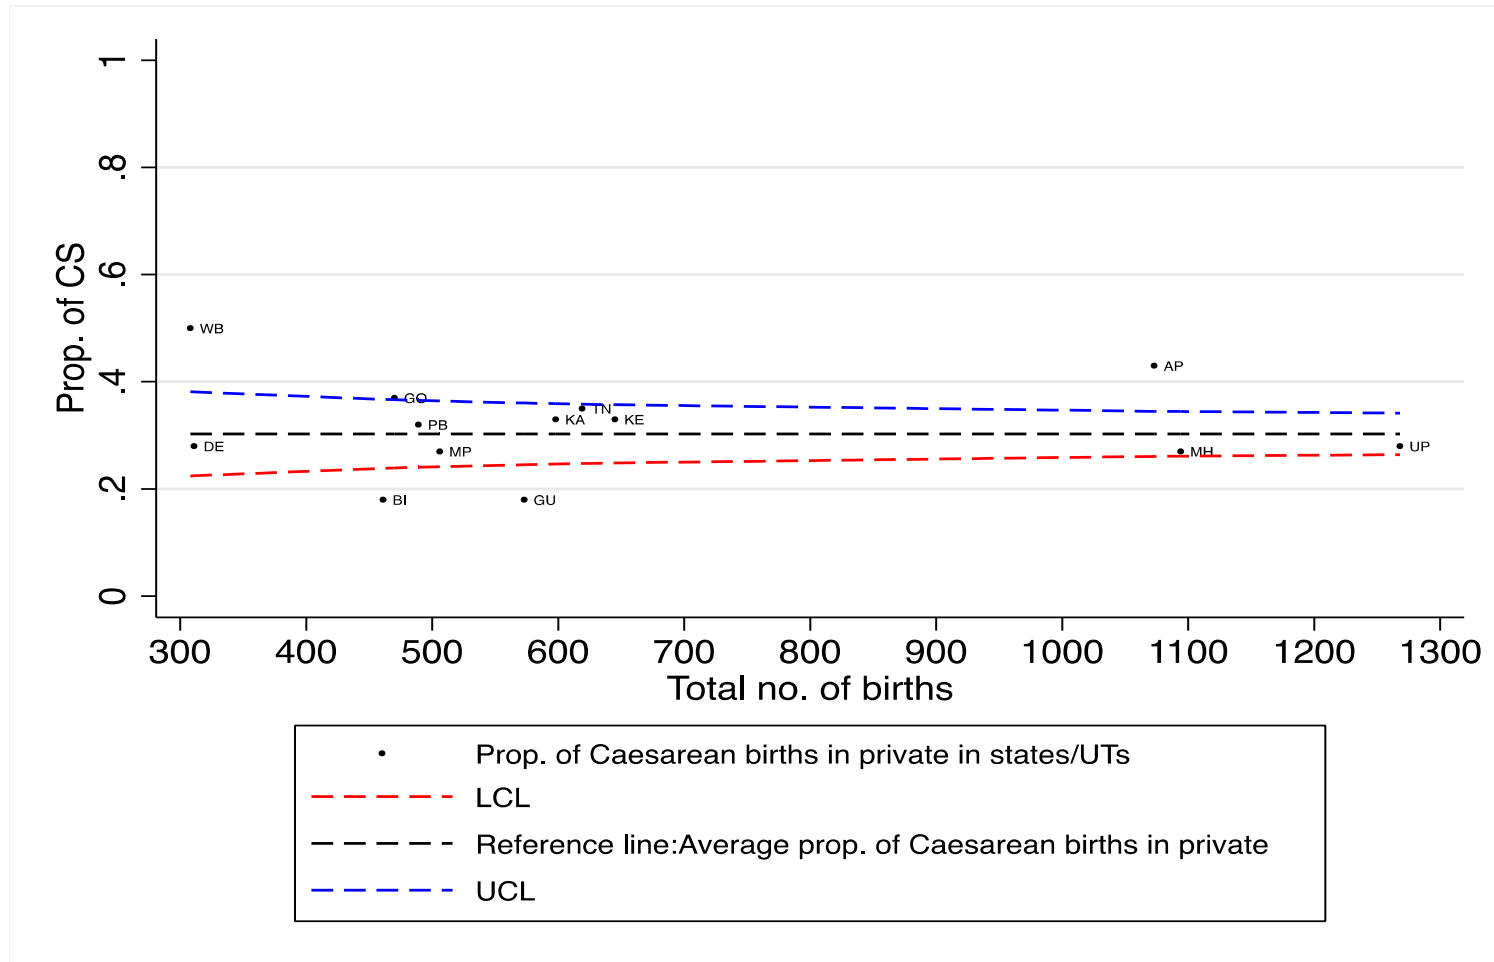

**eFigure 3.** Funnel Plot for Proportion of Cesarean Deliveries in Private Facilities by State and Union Territory in India, 2015 to 2016

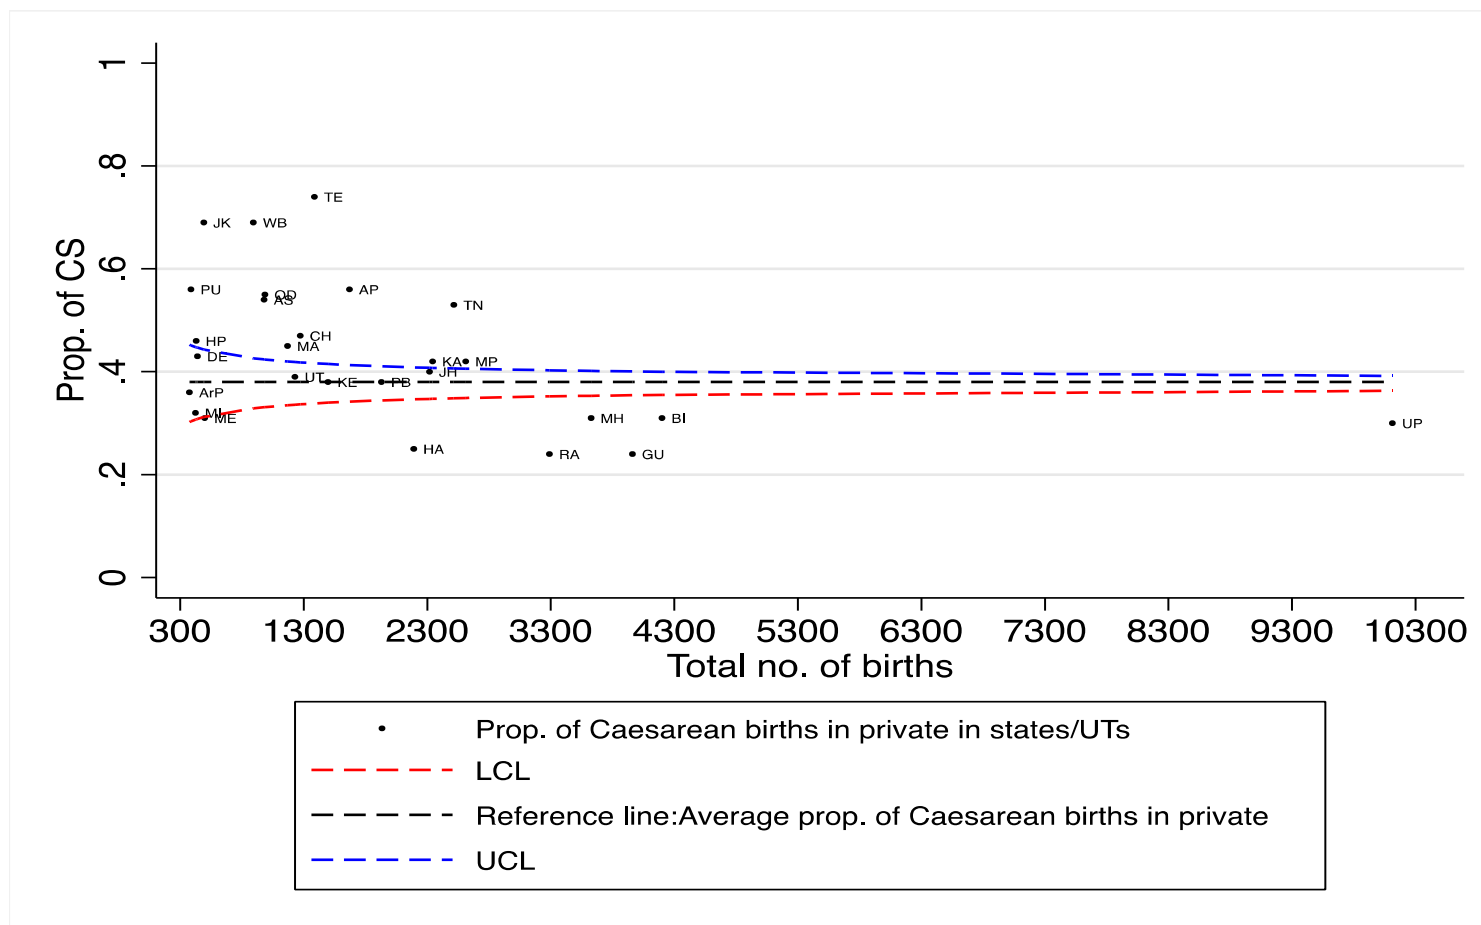

**Note:** Estimates of unweighted proportion of cesarean deliveries in private facilities by states and UTs along with 95% confidence intervals are provided in eFigure 2 and eFigure 3.

Only those states/UTs with more than 300 recorded sampled births in private facilities are shown in these graphs.

CS-Caesarean Section, LCL-Lower Control Limit, UCL- Upper Control Limit.

The abbreviations of States and Union Territories are:

Andaman and Nicobar Islands (AN), Andhra Pradesh (AP), Arunachal Pradesh (ArP), Assam (AS), Bihar (BI), Chandigarh (CG), Chhattisgarh (CH), Dadra and Nagar Haveli (DN), Daman and Diu (DD), Delhi (DE), Goa (GO), Gujarat (GU), Haryana (HA), Himachal Pradesh (HP), Jammu and Kashmir (JK), Jharkhand (JH), Karnataka (KA), Kerala (KE), Lakshadweep (LD), Madhya Pradesh (MP), Maharashtra (MH), Manipur (MA), Meghalaya (ME), Mizoram (MI), Nagaland (NA), Odisha (OD), Puducherry (PD), Punjab (PU), Rajasthan (RA), Sikkim (SI), Tamil Nadu (TN), Telangana (TE), Tripura (TP), Uttar Pradesh (UP), Uttarakhand (UT), West Bengal (WB)
